# Supplementary material
Source: publisher figshare collection journal article supplement (https://acs.figshare.com/ndownloader/files/21303036)
Supplement: Supplementary file 1 [file 21303036]

Supporting information

# Bidirectional Photochromism via Anchoring of Carbon Dots to TiO<sub>2</sub> Porous Films

*Jiarui Wu, Shencheng Fu,\* Xintong Zhang,\* Chunxia Wu, Ailin Wang, Chuang Li, Guiye Shan, and Yichun Liu\**

Center for Advanced Optoelectronic Functional Material Research, Northeast Normal University Changchun, P. R. China (130024)

Key Laboratory of UV-Emitting Materials and Technology (Northeast Normal University), Ministry of Education, Changchun, P. R. China (130024)

\*E-mail: [fusc515@163.com](mailto:fusc515@163.com).

\*E-mail: [xtzhang@nenu.edu.cn](mailto:xtzhang@nenu.edu.cn).

\*E-mail: [ycliu@nenu.edu.cn](mailto:ycliu@nenu.edu.cn).

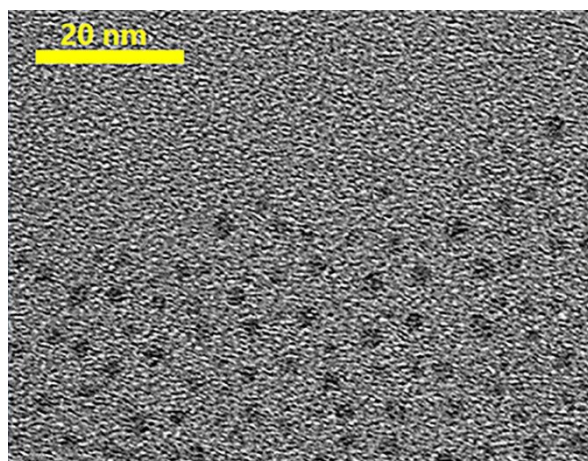

**Figure S1.** TEM photograph of the obtained CDs via hydrothermal synthesis route.

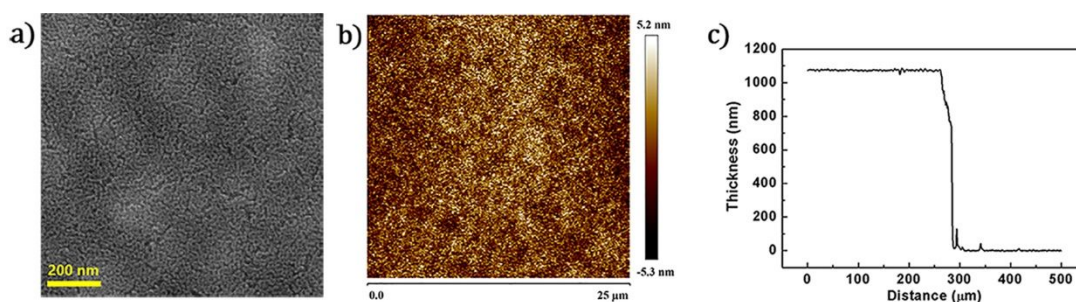

**Figure S2.** (a) SEM image of TiO<sub>2</sub> films. (b) AFM observation of surface of TiO<sub>2</sub> films. (c) Thickness measurement of TiO<sub>2</sub> films with the probe-type optical profilometer (KLA Tencor, D-100).

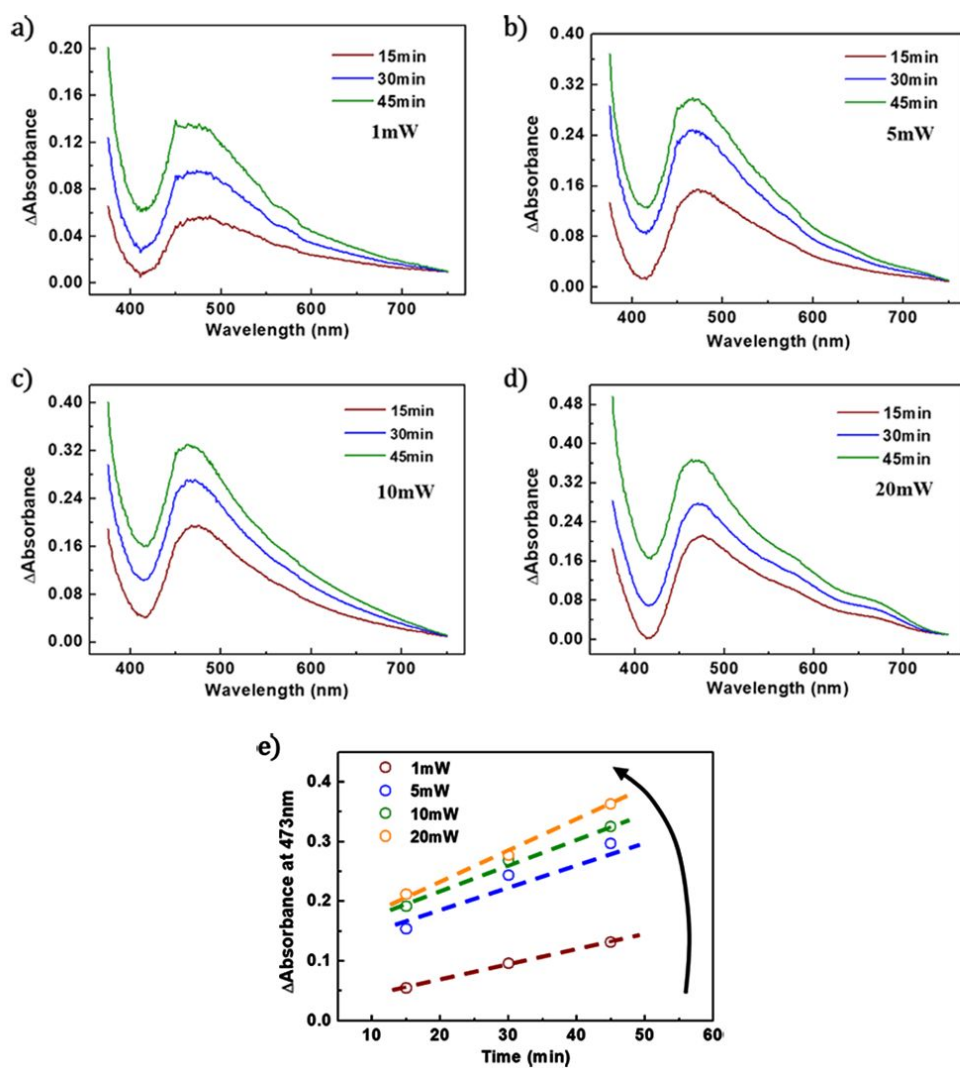

**Figure S3.** Differential absorption spectra of the DA-CDs/TiO<sub>2</sub> film irradiated by the laser beam (473 nm) with the power of (a) 1 mW, (b) 5 mW, (c) 10 mW and (d) 20 mW. (e) Absorbance value at 473 nm versus exposure time under the excitation light with different powers (1 mW, 5 mW, 10 mW and 20 mW).

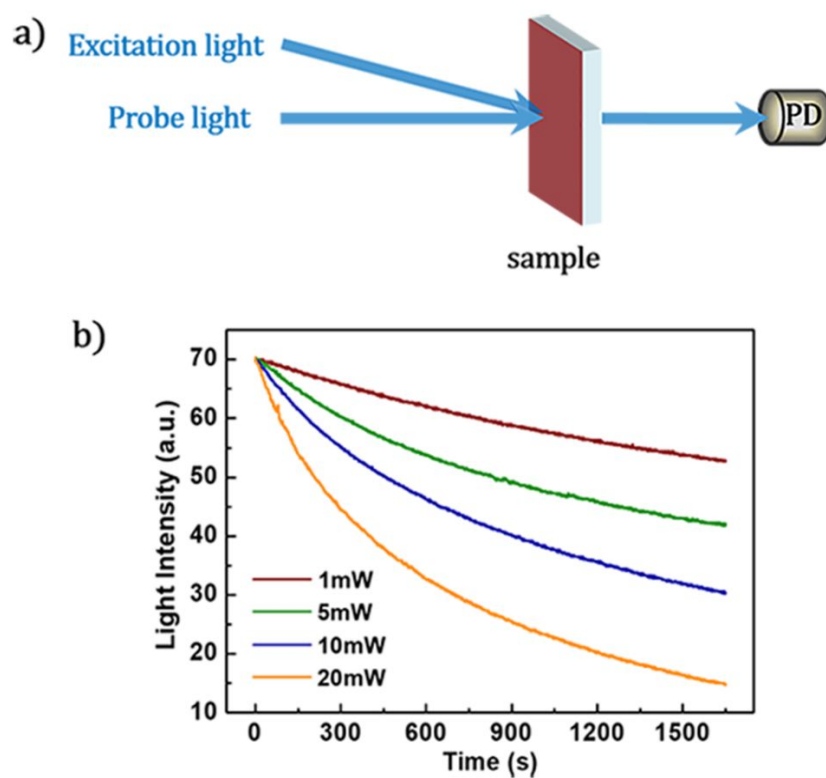

**Figure S4.** (a) Optical setup for monitoring transmittance of probe light (473 nm, 10  $\mu$ W). (b) The transmittance of probe light for the DA-CDs/TiO<sub>2</sub> film under the excitation light with different powers (1 mW, 5 mW, 10 mW and 20 mW) versus exposure time. (PD, photodiode).

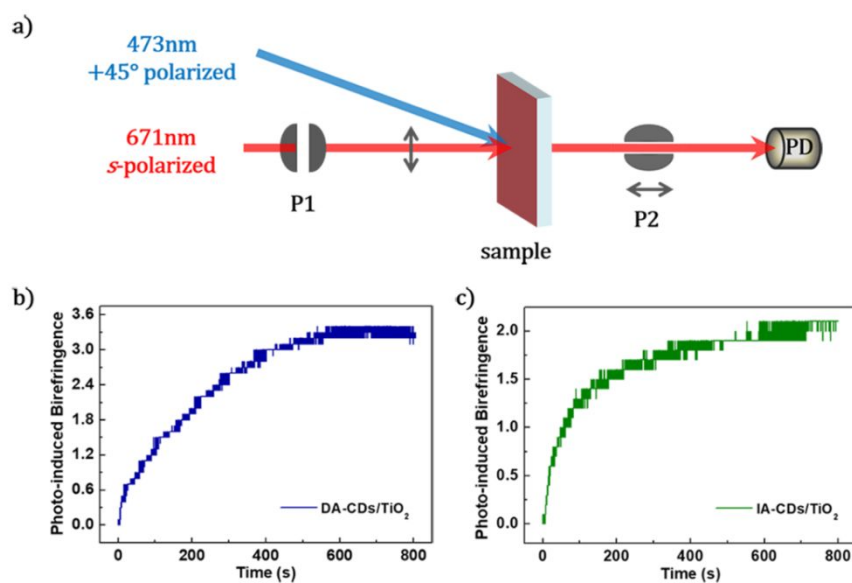

**Figure S5.** (a) Optical setup for photoinduced birefringence. Photoinduced birefringence versus exposure time for (b) DA-CDs/TiO<sub>2</sub> films and (c) IA-CDs/TiO<sub>2</sub> films. (P, polarizer; PD, photodiode).

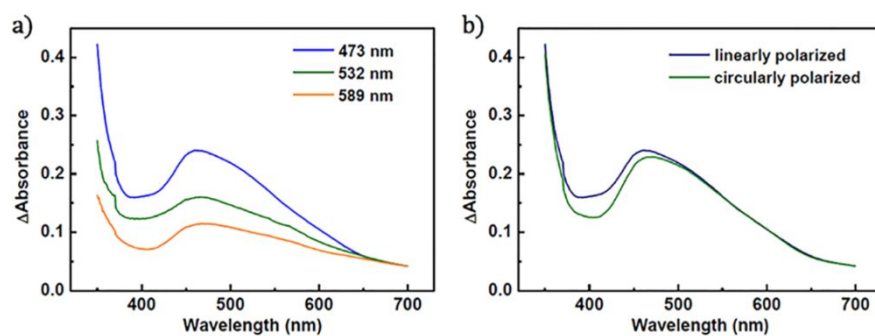

**Figure S6.** (a) Differential absorption spectra of the DA-CDs/TiO<sub>2</sub> film irradiated by the laser beam with the wavelength of 473 nm, 532 nm and 589 nm (all 5 mW). (b) Differential absorption spectra of the DA-CDs/TiO<sub>2</sub> film irradiated by linearly and circularly polarized blue light (both 473 nm, 5 mW).
